1 Evaluation of High-Pressure Processing in Inactivation of the Hepatitis  
2 E Virus

3

4 Neda Nasheri<sup>1</sup>, Tanushka Doctor<sup>1</sup>, Angela Chen<sup>1</sup>, Jennifer Harlow<sup>1</sup>, and Alex Gill<sup>1</sup>

5

6 1- National Food Virology Reference Centre, Bureau of Microbial Hazards, Food  
7 Directorate, Health Canada 251 Sir Frederick Banting Driveway, Ottawa, ON, K1A 0K9,  
8 CANADA.

9

10

11 Corresponding author: Neda Nasheri [neda.nasheri@canada.ca](mailto:neda.nasheri@canada.ca)

12

## 13 **Abstract**

14 Hepatitis E virus (HEV) causes acute hepatitis with approximately 20 million cases per year  
15 globally. While HEV is endemic in certain regions of Asia, Africa and South America, it is  
16 considered an emerging foodborne pathogen in developed countries. Based on genetic diversity,  
17 HEV is classified into different genotypes, with genotype 3 (HEV-3) being most prevalent in  
18 Europe and North America. The transmission of HEV-3 has been shown to be zoonotic and  
19 mainly associated with the consumption of raw or undercooked pork products. Herein, we  
20 investigated the efficacy of high-pressure processing (HPP) in the inactivation of HEV-3 using a  
21 cell culture system. HPP has been indicated as a promising nonthermal pathogen inactivation  
22 strategy for treatment of certain high-risk food commodities, without any noticeable changes in  
23 their nature. For this purpose, we treated HEV-3 in media as well as in artificially inoculated  
24 pork pâté, with different conditions of HPP: 400 MPa for 1 and 5 minutes, as well as 600 MPa  
25 for 1 and 5 minutes, at ambient temperature. In general, we observed approximately a 2-log  
26 reduction in HEV load by HPP treatments in media; however, similar treatment in the pork pâté  
27 resulted in a much lower reduction in viral load. Therefore, the efficacy of HPP treatment in the  
28 inactivation of HEV-3 is matrix-dependent.

29 **Importance:** HEV is an emerging foodborne pathogen in industrialized countries, and its  
30 transmission is associated with the consumption of contaminated undercooked pork product. In  
31 this work, we employed an infectivity assay to investigate the potential of high-pressure in  
32 inactivation of HEV in media and ready-to-eat pork pâté. We demonstrated that the effect of  
33 HPP on inactivation of HEV depends on the surrounding matrix.

34 **Keywords:** Hepatitis E virus, high-pressure processing, infectivity assay, droplet-digital RT-  
35 PCR

## 36 **Introduction**

37 HEV is a single-stranded RNA virus with positive polarity belonging to the *Hepeviridae* family  
38 (1). The HEV genome has 3 open reading frames (ORFs): ORF1 encodes a long non-structural  
39 polyprotein with multiple functions; ORF2 encodes the viral capsid protein; and ORF3 encodes a  
40 small phosphoprotein with structural and non-structural functions (2), (3). The *Hepeviridae*  
41 contain two genera *Orthohepevirus* and *Piscihepevirus*, which infect a wide range of vertebrate  
42 hosts (4). Four genotypes (HEV-1, HEV-2, HEV-3 and HEV-4) of the species *Orthohepevirus A*  
43 are associated with human illness. HEV-1 and HEV-2 are restricted to humans and are prevalent  
44 in regions with poor water sanitation, such as the developing countries of Asia, Africa, South and  
45 Central America (5, 6). On the other hand, HEV-3 and HEV-4 are considered to be zoonotic  
46 pathogens as they have a much wider range of mammalian hosts including, among others,  
47 domestic and wild swine and ruminants (7-9). Hepatocytes have been identified as the primary  
48 sites of HEV replication, but the virus can replicate in other tissues such as epithelial cells of the  
49 small intestine, placenta, and muscle (10-13).

50 Clinical manifestation of HEV can vary depending on virus genotype and the host. It is generally  
51 believed that the majority of HEV infections are subclinical (14). In symptomatic cases, HEV  
52 most commonly presents as a self-limiting, acute infection (6, 15). However, chronic HEV  
53 infection can occur after infection with HEV-3, and possibly HEV-4, specifically in  
54 immunosuppressed patients, such as human immunodeficiency virus patients or those receiving  
55 immunosuppressing treatment (16-18). In recent years, the incidence rate of HEV-3 infection has  
56 increased in industrialized countries, likely through zoonotic exposure (19). Due to the lack of  
57 surveillance data, the actual HEV incidences and fatalities per country are often unknown, and  
58 therefore the true burden of HEV disease remains unclear (19, 20).

59 Multiple lines of evidence indicate that infection with HEV-3 is common among domestic swine  
60 in developed countries (Reviewed in (21)), however HEV-3 viremia in swine does not cause any  
61 noticeable clinical symptoms (22-24). HEV-3 infection of domestic swine can potentially result  
62 in contamination of pork products. The reported prevalence of contaminated pork products varies  
63 from less than 1% to more than 50%, depending on the region and the tested commodity  
64 (reviewed in (21)). In a previous study conducted by, our laboratory it was observed that 10.5%  
65 of sampled raw pork livers, and 47% of the sampled commercial pâté, marketed in Canada, were  
66 positive for HEV RNA (25). Because of this high prevalence, efficient strategies to inactivate  
67 HEV in ready-to-eat pork products should be considered in order to prevent foodborne HEV  
68 infection.

69 High pressure processing (HPP) is a “nonthermal pasteurization” technique, which can inactivate  
70 foodborne pathogens within certain commodities such as ready-to-eat meats and fruit juices to  
71 increase their shelf life or improve safety (26) . It is generally believed that high-pressure  
72 treatment denatures the viral capsid proteins and therefore incapacitates the viral particles from  
73 attachment and penetration to the host cells (26, 27). However, due to the lack of reliable  
74 infectivity assays, most HEV inactivation studies to date have been limited to using surrogate  
75 viruses (27, 28). Recently, successful replication of HEV-3c strain 47832c (GenBank accession #  
76 KC618403), in A549/D3 cells was demonstrated by Johne and coworkers (29, 30). This system  
77 has been employed to study the temperature sensitivity of HEV (30), demonstrating a potential  
78 for this system to be used in other HEV inactivation studies. Herein, we describe the  
79 employment of this HEV infectivity assay to examine the effect of HPP treatment on HEV  
80 infectivity in both cell culture media and ready-to-eat pork pâté.

## 81 **Materials and Methods**

### 82 **Cells & Viruses**

83 A549/D3 human lung carcinoma cells, kindly provided by Dr. R. Johne (German Federal  
84 Institute for Risk Assessment, Berlin), were cultured in Minimum Essential Media (MEM)  
85 (Gibco, MA, USA), supplemented with 1% non-essential amino acids, 1% glutamine, 0.5%  
86 gentamicin, and 10% fetal bovine serum (FBS) (Gibco, MA, USA).

87 The optimal cell density of A549/D3 cells per well was determined to be  $4 \times 10^4$  cells per well of  
88 a 96-well plate. The plate was then incubated for 2 days at 37°C and 5% CO<sub>2</sub>. Growth media  
89 was replaced with fresh media and cells were incubated under the same conditions for another 3  
90 days, until the infectivity assay was performed.

### 91 **Sample preparation for HPP treatment**

92 Sterile polyethylene tubes (Tygon ®) 1.5 cm in length were filled with 200 µl of cell growth  
93 media containing  $2 \times 10^6$  genome copies of HEV-3 strain 47832c and heat sealed. Triplicate tubes  
94 were prepared in sets for each treatment duration (0, 1, or 5 min), for a total of 9 tubes. The tubes  
95 for each time point were then placed in polyethylene (PE) bags containing 10% bleach, to  
96 inactivate viral particles in the event of leak or rupture from the primary container. The sample  
97 bags were then heat-sealed, while minimising air bubbles in the bleach solution. Prepared sample  
98 bags were stored on ice until the HPP treatment.

99 Pork pâté samples were prepared from commercial product obtained from a local grocery store.  
100 Individual samples of 2 g were weighed out to prepare triplicate samples. An uninoculated pâté  
101 sample was retained as a negative control. Samples were inoculated with 250 µl of cell culture  
102 medium containing approximately  $4 \times 10^7$  genome copies, which was spread over the entire

103 surface area of the sample. . Inoculated samples were dried for 10 min in a biosafety cabinet,  
104 prior to being placed in individual PE bags, which were heat-sealed with minimal air space.  
105 Triplicate samples for each treatment duration (0 min, 1 min, 5 min) were then placed in a  
106 second PE bag containing 10% bleach, and stored on ice prior to HPP treatment.

### 107 **HPP Treatment**

108 High-pressure processing was implemented using a high-pressure pilot unit manufactured by  
109 Dustec Hochdrucktechnik GmbH (Wismar, Germany), with a 1-liter pressure vessel and water as  
110 the pressure medium. The rate of pressurisation was 10 MPa/s and rate of depressurisation was -  
111 20 MPa/s. Sample packages were pressurized to 400 MPa or 600 MPa with a hold time at  
112 maximum pressure of 1 or 5 min. As determined by three thermocouples inside the pressure  
113 vessel, the temperature of the pressure medium was initially 24.0 °C (standard deviation (SD) 0.3  
114 °C, n=4). Adiabatic heating during pressurisation resulted in an average temperate increase of  
115 8.2 °C (SD 0.1 °C, n=2) when pressurised to 400 MPa and 12.9 °C (SD 0.1 °C, n=2) when  
116 pressurised to 600 MPa.

### 117 **Virus Extraction**

118 The ISO-15216-1:2017 (31) method was used to extract HEV from pork pâté samples post HPP  
119 treatment. Briefly, the pâté samples were transferred to stomacher bags with a filter compartment  
120 and 16 mL of Tris Glycine Beef Extract (TGBE) was added respectively. The stomacher bags  
121 were then incubated on a rocking plate at room temperature for 20 min. The resulting suspension  
122 was centrifuged at  $10,000 \times g$  for 30 min at 4 °C. The supernatant pH was balanced using  
123 approximately 110 µl of 12 N HCl. 5 × polyethylene glycol 6000 (PEG)/NaCl of ¼ volumes of  
124 the weight of each sample was added to each tube and the samples were incubated on ice on a  
125 rocking plate for 1 hour. Post incubation, samples were centrifuged at  $10,000 \times g$  for 30 min at 4

126 °C and the supernatant was discarded. The pellets containing the virus particles were suspended  
127 in 500 µl PBS and stored at -80 °C until required for the infectivity assay.

### 128 **Determining the Limit of Quantification**

129 In order to determine the limit of quantification of the infectivity assay, cell culture-adapted  
130 HEV-3 strain 47832c at ten concentrations from  $5 \times 10^2$  to  $1 \times 10^6$  genome copies per well were  
131 used to infect A549/D3 cells in triplicate experiments (29, 30). The infected and control cells,  
132 which were not exposed to viral particles, were cultured for 14 days. The media supernatant was  
133 then collected and the HEV RNA levels were analysed by droplet-digital RT-PCR (ddRT-PCR).

### 134 **RNA Isolation and Quantification**

135 The Viral RNA Mini Kit (Qiagen, Mississauga, Ontario, Canada) was used to extract RNA from  
136 the collected infectivity assay growth media. Quantification of recovered RNA was conducted as  
137 previously described using Bio-Rad droplet digital PCR (ddRT-PCR) technology (25, 32).

### 138 **DNA sequencing**

139 Conventional RT-PCR was carried out using the HEV-11 primers (33), which amplifies the  
140 region between the positions 5468-6018 of the HEV-3 strain 47832c. Gel-purified RT-PCR  
141 products were sequenced directly using the BigDye<sup>®</sup> terminator v 3.1 DNA sequencing kit  
142 (Applied Biosystems, Foster City, California) according to manufacturer's instructions.  
143 Fluorophore-labelled reactions were purified using the Wizard<sup>®</sup>MagneSil<sup>®</sup> Sequencing Reaction  
144 Clean-up System (Promega, Madison, Wisconsin). Samples were sequenced in both directions  
145 using a 3130xl Genetic Analyzer (ThermoFisher Scientific). HEV-positive sequences were  
146 determined by querying NCBI BLAST and edited using BioEdit (Ibis Biosciences, Carlsbad,  
147 California).

148 Multiple sequence alignments were performed using both the Multiple Sequence Comparison by  
149 Log-Expectation (MUSCLE) (34) and Clustal W (35) included in the MEGA6 software (36) .  
150 The sequences obtained in this study have been deposited in GenBank under Accession Numbers

## 151 **Data analysis**

152 All experiments were performed in triplicate. Statistical analysis was performed by Microsoft  
153 Excel 2016. Paired student's *t*-test was conducted to obtain *P* values.

## 154 **Results**

### 155 **Limit of Quantification**

156 The correlation between the inoculated HEV genome copy number and the harvested genome  
157 copy number at 14 days post infection (d.p.i) is shown in Figure 1. The relationship between the  
158 two is linear over the range studied with a  $r^2$  value of 0.9823, this demonstrates that the amount  
159 of harvested HEV RNA is directly correlated to the of HEV inoculum. The limit of  
160 quantification by this method was determined to be  $1 \times 10^4$  genome copies per well (100 gc/ $\mu$ l) of  
161 the inoculated virus, and inoculation with titres below this amount did not reliably and  
162 reproducibly produce quantifiable progeny virus at 14 d.p.i. Importantly, these data suggest that  
163 on average, 1 in  $10.2 \pm 4.8$  of the inoculated genomes is capable of replication in cell culture. In  
164 other words, the infectivity ratio of the virus is 1 in  $10.2 \pm 4.8$  genome.

### 165 **HEV inactivation in cell culture media**

166 In commercial food processing, HPP is applied to meat products with pressures typically ranging  
167 between 400 and 600 MPa for 1 to 10 min (37). To determine the role of pressure and hold time  
168 on the inactivation of HEV by HPP, HEV-3 strain 47832c, in cell culture media, were treated at  
169 pressure levels of 400 MPa and 600 MPa for 1min and 5 min starting at 24 °C. The undiluted



170 and 1:10 diluted HPP-treated viral solutions, along with untreated controls, were used to infect  
171 A549/D3 cells in duplicate as described above. The decrease in infectious HEV particles was  
172 determined by comparing the reduction in HEV RNA at 14 d.p.i in HPP-treated samples with the  
173 untreated controls. As shown in Figure 2, reductions of  $1.6\pm 0.33$  log and  $1.93\pm 0.29$  log in  
174 infectious viral particles were observed for the samples that were treated at 400 MPa for 1 min  
175 and 5 min, respectively. Increasing the pressure to 600 MPa resulted in a slight but not  
176 statistically significant increase in viral inactivation;  $2.27\pm 0.03$  log and  $2.2\pm 0.28$  log reduction  
177 for 1 min and 5 min treatments, respectively (Figure 2). Neither varying the treatment pressure  
178 (400 MPa or 600 MPa) nor the hold time at maximum pressure (1 min or 5 min) resulted in  
179 statistically significant reductions in the viral inactivation ( $P > 0.1$ ).

#### 180 **Examining amino acid variation in the capsid protein**

181 The HEV capsid protein consists of 660 residues and 4 main structural and functional domains;  
182 N, S, M and P (38, 39). To examine whether the capsid protein of the viruses that survived the  
183 HPP treatment is different from that of the input or the untreated viruses, we compared the amino  
184 acid sequence of the partial capsid protein encompassing the N and S domains of the viruses  
185 treated with 600 MPa for 1 min hold time and 600 MPa for 5 min hold time with the input and  
186 untreated viruses. As shown in Figure 4, no synonymous change was observed between the  
187 treated and untreated viruses within the sequenced range.

#### 188 **HEV inactivation in ready-to-eat pork pâté**

189 In order to investigate whether food matrices can protect from or potentiate the inactivation of  
190 HEV by HPP, experiments were conducted with a high-risk ready-to-eat pork product,  
191 artificially inoculated pork pâté. HPP treatment at 400 MPa or 600 MPa for up to 5 min did not  
192 cause any noticeable change in the appearance of pâté samples (Supplementary Figure 1). HEV

193 was extracted using the ISO-15216-1 method and was used to infect A549/D3 cells. At 14 d.p.i  
194 the media was harvested and examined for the presence of viral RNA using dd RT-PCR. The  
195 effect of the HPP treatment was determined by comparing the viral load in treated samples  
196 against the untreated samples. Surprisingly, HPP treatment of pork pâté at 400 and 600 MPa for  
197 1 min and 5 min, resulted in significantly lower reductions in viable HEV than observed in cell  
198 culture media. At 400 MPa the reduction in viable HEV was only  $0.48 \pm 0.14$  log and  $0.46 \pm 0.13$   
199 log, , and at 600 MPa  $0.39 \pm 0.08$  log and  $0.52 \pm 0.24$  log, respectively for 1 min and 5 min  
200 treatments (Figure 3). As observed in culture media, no significant difference in virus  
201 inactivation was observed between 1 and 5 min treatment at the same pressure ( $P > 0.1$ ), also  
202 increasing pressure to 600 from 400 MPa did not result in increased HEV inactivation in pork  
203 pâté ( $P > 0.1$ ).

## 204 **Discussion**

205 Herein, we employed an infectivity-based model for examining the infectious dose of HEV-3  
206 strain 47832c in cell culture. Using this system, we demonstrated that approximately 1 in  $10 \pm 5$   
207 viral genomes is capable of replicating in A549 cells. This finding is in line with the high  
208 infectivity of other foodborne viruses such as norovirus and hepatitis A virus (40-42).

209 We next employed this system to investigate HEV inactivation by HPP treatment. The untreated  
210 and treated virus stocks were used to infect the A549 cells and the infected cells were examined  
211 for the production of progeny virus in the culture. Using this system, we demonstrated that an  
212 approximately 2-log reduction in viral load can be accomplished by treatment of HEV in media  
213 at 400 MPa with a 1 min hold time. Increasing the pressure to 600 MPa or the hold time to 5 min  
214 did not have any significant effect on the reduction of viral load. However, HEV in artificially

215 contaminated pâté was protected from HPP treatment, as the reduction in infectious HEV  
216 particles was less than 0.5 log.

217 To the best of our knowledge, this is the first published study to quantify the inactivation of HEV  
218 following HPP treatment. HEV response to 500 MPa for 15 min has been previously investigated  
219 with RT-qPCR viability markers (PMAxx and platinum chloride, PtCl<sub>4</sub>-RT-qPCR), but was only  
220 able to report the presence of intact viral particles post treatment (43). The inactivation by HPP  
221 of other foodborne viruses, including norovirus, Hepatitis A virus (HAV), and surrogates for  
222 foodborne viruses has been investigated (26, 44-46). The sensitivity of specific viruses to high-  
223 pressure treatment can vary significantly. Kingsley et al. reported that HAV in cell culture media  
224 under a 5 min hold period was stable at pressures up to 300 MPa, but inactivation increased with  
225 increasing pressure between 300 and 450 MPa, to maximum of 6 log reduction. In contrast, in  
226 feline calicivirus (FCV) (a surrogate for norovirus) 3 log reductions were observed at 200 MPa  
227 and no infectious particles were recovered following treatment at 275 MPa (44). Inactivation of  
228 norovirus suspended in buffer has been reported at pressures in excess of 200 MPa (5 min hold, 4  
229 °C), but the sensitivity to pressure was variable between the four strains studied, with the most  
230 sensitive strain reduced by 4 log at 600 MPa and the least sensitive by only 1 log under the same  
231 conditions (45) .

232 HEV is a quasi-enveloped virus (47, 48), and the presence of a lipid envelope may have a  
233 protective role. If so the impact HPP could potentially be enhanced in the presence of detergents  
234 or other membrane disrupting molecules. Alternatively, differences in pressure resistance  
235 between strains of the same virus may be related to amino acid variability in capsid proteins, or  
236 lipids composing membranes.

237 The sequence analysis of partial capsid protein revealed that there is no amino acid change  
238 between the treated and untreated viruses within the N and S domain. However, to determine  
239 whether the capsid of the surviving viruses are different from the untreated viruses, full capsid  
240 sequence analysis is required. In this study, our attempts to retrieve the full capsid sequence from  
241 the treated samples were not successful. Nevertheless, we cannot rule out the possibility of  
242 reversion of mutations during the culture period (14 d).

243 In this study, we observed that HEV in pork pâté was protected from HPP treatment, compared  
244 to HEV in cell culture media. The dependency on the surrounding matrix of the response of  
245 bacterial cells to HPP treatment is a well-established phenomenon, with salt concentration, pH,  
246 fat content, and the presence of specific molecules reported to affect cell survival the variables  
247 (49). Similar observations have been made for viruses, with pH, temperature and solute  
248 concentration reported as variables in the response of norovirus to HPP (45). The presence of  
249 food components has been demonstrated to protect viral capsids from HPP denaturation (50). A  
250 further demonstration of the challenge in extrapolating studies in model systems to compel  
251 foods, a human volunteer study with oysters inoculated with 4 log PFU of norovirus (GI.1.  
252 Norwalk) found that a treatment of 400 MPa (5 min hold, 6 °C) was insufficient to protect  
253 volunteers, though 600 MPa was protective for all volunteers (51).

254 The protective effect of food components against viral capsid denaturation has already been  
255 demonstrated (50). It has also been reported that fat increases the stability of hepatitis A virus in  
256 skim milk and cream against heat treatment (52); however, whether the fat and salt content of the  
257 treated matrix affects the structural integrity of HEV and its sensitivity towards pressure, needs  
258 to be further investigated.

259 Our data demonstrated that the viral titre post HPP treatment of pâté under 600MPa for 5 min  
260 reaches to  $1.5 \times 10^3$  in cell culture. This indicates that replication of virus occurred, and therefore  
261 the elimination of HEV infectivity was not complete. In another study, it was shown that the  
262 treatment of HEV solution at 500 MPa for 15 min did not result in complete inactivation assayed  
263 by using viability markers (PMAxx and platinum chloride, PtCl<sub>4</sub>-RT-qPCR) (43). Knowing that  
264 the virus is capable of replication (and therefore has the potential to cause illness) is important  
265 for interpretation of surveillance and inactivation studies on HEV to inform risk assessment and  
266 mitigation (28) . Especially that the dose-response relationship of HEV is unknown, and it is not  
267 clear which level of infectivity reduction is required to prevent infection in human. Therefore,  
268 the generation of more detailed data on the infectivity reduction for different HEV strain-matrix  
269 combinations would enhance our understanding of HEV stability in the environment and in  
270 foods. (29).

271 In summary, we have demonstrated that 1) there is a direct and linear correlation between the  
272 viral titres used to infect A549/D3 cells and the harvested virus at 14 d.p.i 2) the effect of HPP  
273 on inactivation of HEV depends on the surrounding matrix.

## 274 **Acknowledgements**

275 We would like to thank Dr. Reimar Johne from German Federal Institute for Risk Assessment,  
276 Berlin for generously providing the A549/D3 cells and HEV-3 strain 47832c. This work was  
277 financially supported by the Research Division of the Bureau of Microbial Hazards, Health  
278 Canada.

279

280 **Figure Legends**

281 **Figure 1.** Correlation between the inoculated HEV-3c strain 47832c (genome copy number) and  
282 the harvested HEV (genome copy number) 14 d.p.i in A549/D3 cells.

283 **Figure 2.** The effect of HPP treatment on HEV-3c strain 47832c in cell culture media. The  
284 samples containing  $2 \times 10^6$  genome copies were treated at 400 MPa and 600 MPa for 1 and 5 min  
285 at ambient temperature. The effect is shown in comparison to the untreated viral stock.

286 **Figure 3.** The effect of HPP treatment on HEV-3c strain 47832c in ready-to-eat pork pâté. The  
287 samples containing  $4 \times 10^7$  genome copies of HEV were treated at 400 MPa and 600 MPa for 1  
288 and 5 min at ambient temperature. The effect is shown in comparison to the untreated but  
289 inoculated samples.

290 **Figure 4.** Amino acid sequence alignment of the N domain of the capsid protein (ORF2). The  
291 input, the untreated, treatment at 600 MPa for 1 min hold time and 600 MPa for 5 min hold time.

292 **Supplementary Figure 1.** Visual assessment of HPP processed pork pâté samples. Samples  
293 were treated in triplicate at 400 MPa (A & B) and 600 MPa (C & D) for 1 min and 5 min  
294 respectively at ambient temperature. Visual inspection and documentation were conducted post-  
295 treatment to detect any changes in food quality or appearance (size, colour, texture, and secretion  
296 of fluids).

297 **Figure 1**

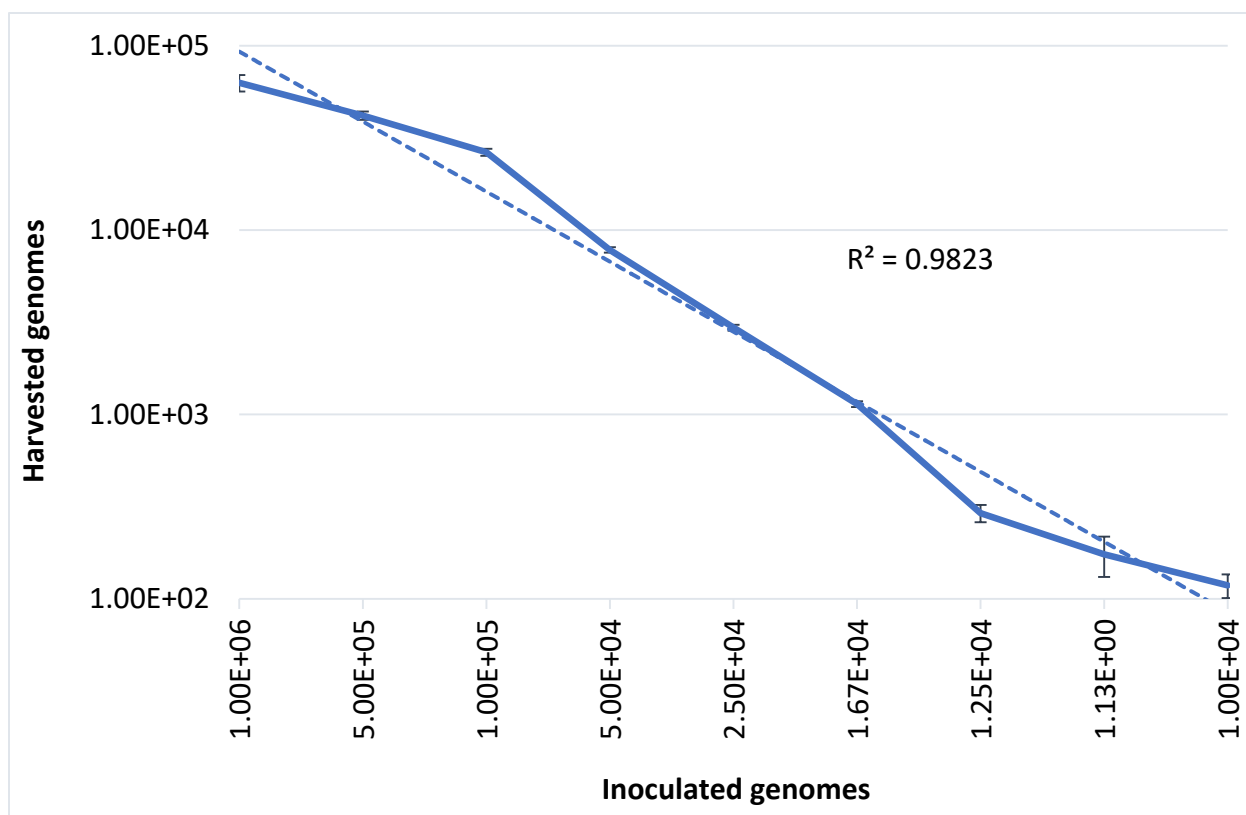

298

299

300

301

302 **Figure 2**

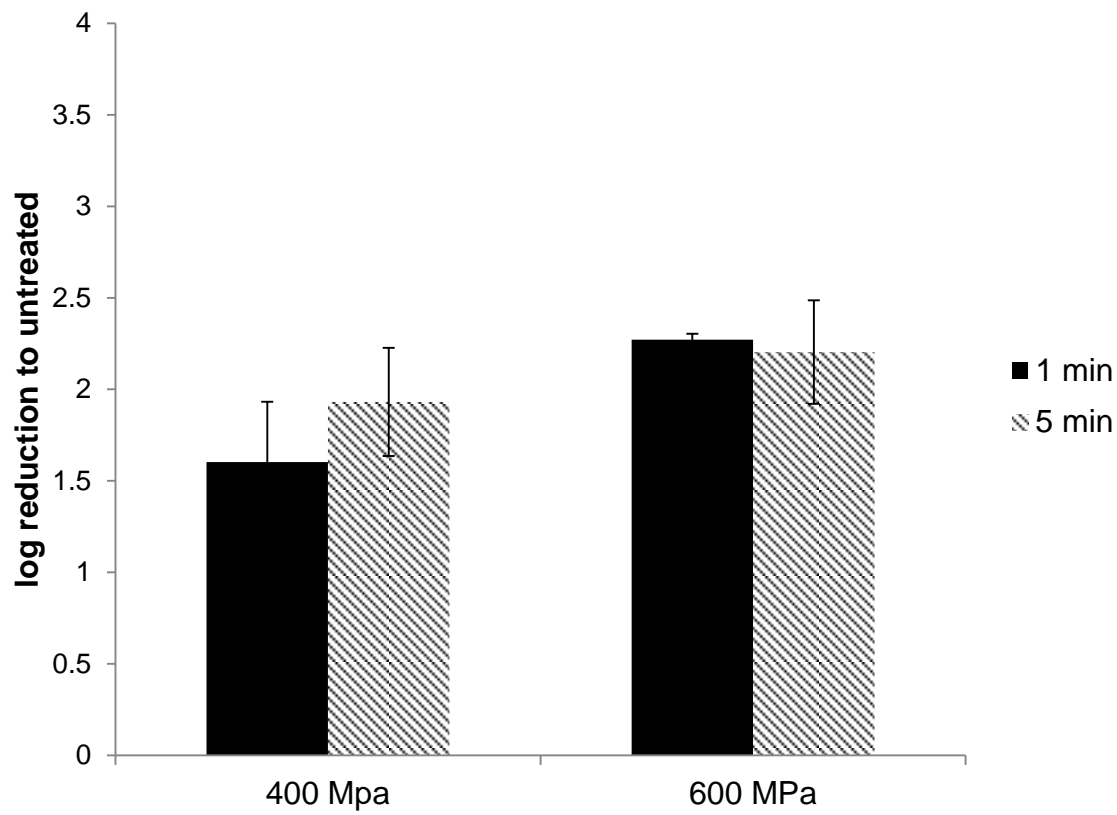

303

304

305

306



307 **Figure 3**

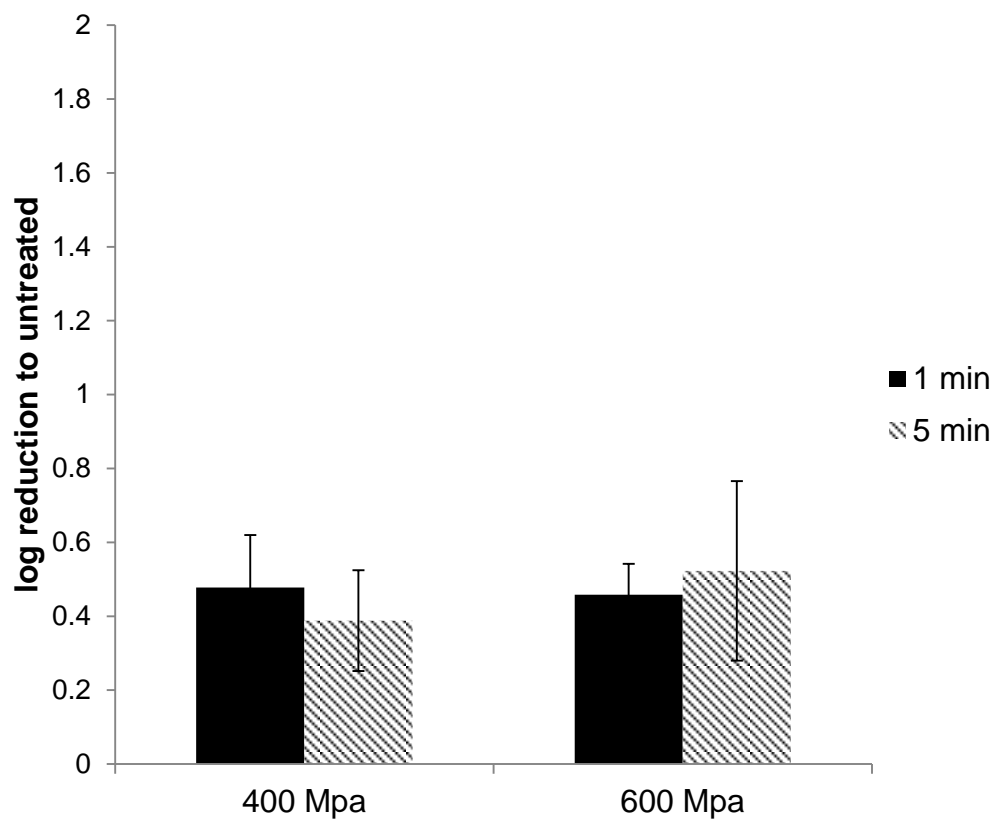

308

309

310

311 **Figure 4**

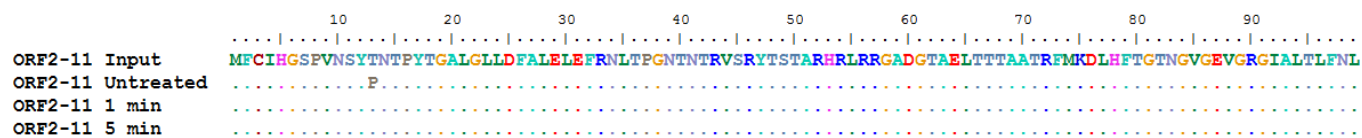

312

313

314

315 **Supplementary Figure 1**

316

317

318

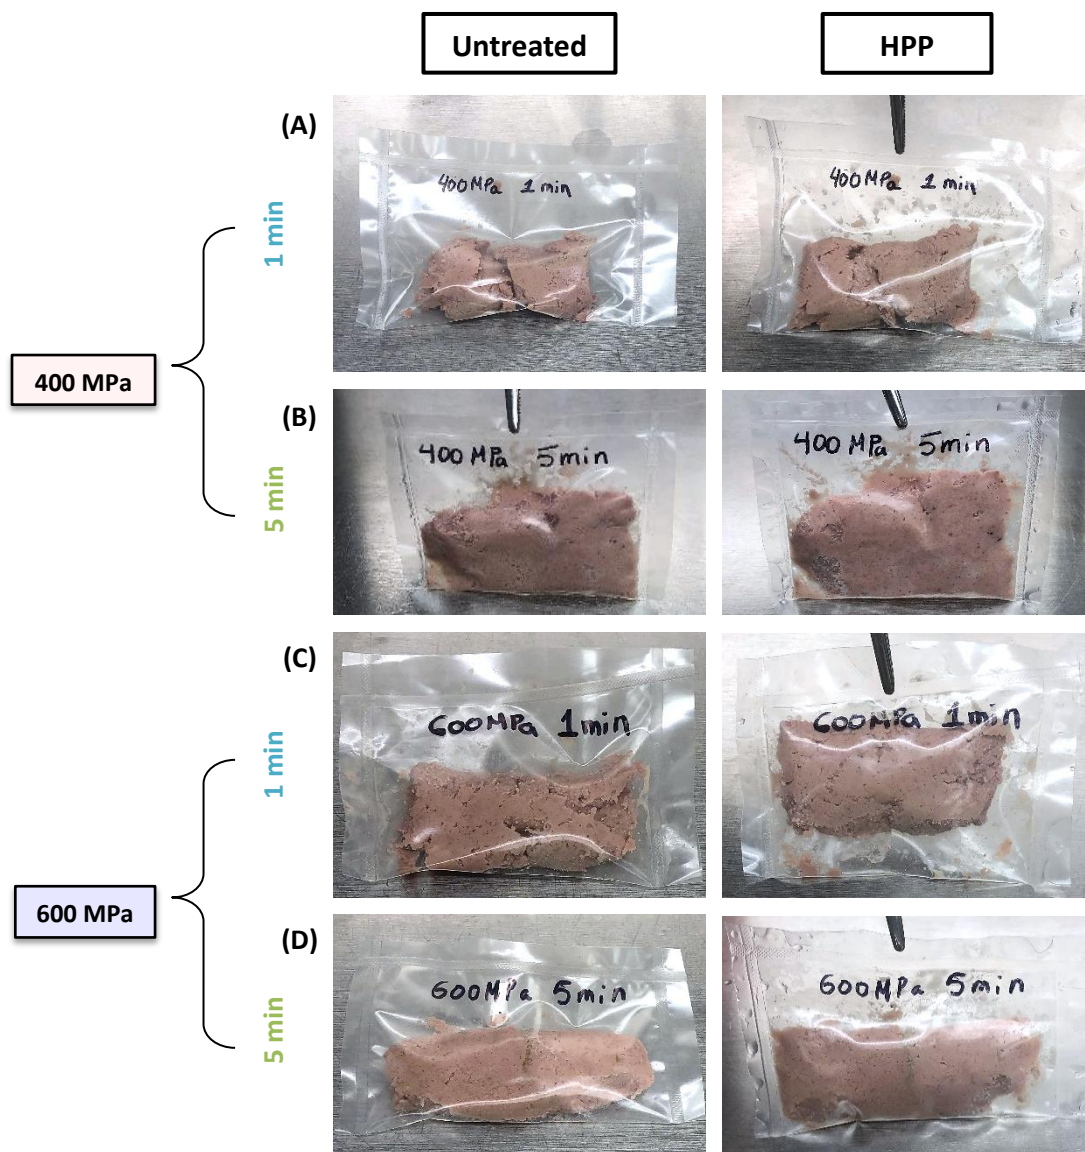

## 319 **References**

- 320 1. Smith DB, Simmonds P, International Committee on Taxonomy of Viruses Hepeviridae Study  
321 Group, Jameel S, Emerson SU, Harrison TJ, Meng XJ, Okamoto H, Van der Poel WH, Purdy  
322 MA. 2014. Consensus proposals for classification of the family Hepeviridae. *J Gen Virol*  
323 95:2223-2232. doi:10.1099/vir.0.068429-0 [doi].
- 324 2. Cao D, Meng XJ. 2012. Molecular biology and replication of hepatitis E virus. *Emerg*  
325 *Microbes Infect* 1:e17. doi:10.1038/emi.2012.7 [doi].
- 326 3. Panda SK, Varma SP. 2013. Hepatitis e: molecular virology and pathogenesis. *J Clin Exp*  
327 *Hepatol* 3:114-124. doi:10.1016/j.jceh.2013.05.001 [doi].
- 328 4. Primadharsini PP, Nagashima S, Okamoto H. 2019. Genetic Variability and Evolution of  
329 Hepatitis E Virus. *Viruses* 11:10.3390/v11050456. doi:E456 [pii].
- 330 5. Pisano MB, Martinez-Wassaf MG, Mirazo S, Fantilli A, Arbiza J, Debes JD, Re VE. 2018.  
331 Hepatitis E virus in South America: The current scenario. *Liver Int* 38:1536-1546.  
332 doi:10.1111/liv.13881 [doi].
- 333 6. Hartl J, Wehmeyer MH, Pischke S. 2016. Acute Hepatitis E: Two Sides of the Same Coin.  
334 *Viruses* 8:10.3390/v8110299. doi:E299 [pii].
- 335 7. Pavio N, Meng XJ, Doceul V. 2015. Zoonotic origin of hepatitis E. *Curr Opin Virol* 10:34-41.  
336 doi:10.1016/j.coviro.2014.12.006 [doi].
- 337 8. Park WJ, Park BJ, Ahn HS, Lee JB, Park SY, Song CS, Lee SW, Yoo HS, Choi IS. 2016.  
338 Hepatitis E virus as an emerging zoonotic pathogen. *J Vet Sci* 17:1-11.  
339 doi:10.4142/jvs.2016.17.1.1 [doi].
- 340 9. Sooryanarain H, Meng XJ. 2019. Hepatitis E virus: reasons for emergence in humans. *Curr*  
341 *Opin Virol* 34:10-17. doi:S1879-6257(18)30110-X [pii].
- 342 10. Wilhelm B, Leblanc D, Houde A, Brassard J, Gagne MJ, Plante D, Bellon-Gagnon P, Jones  
343 TH, Muehlhauser V, Janecko N, Avery B, Rajic A, McEwen SA. 2014. Survey of Canadian  
344 retail pork chops and pork livers for detection of hepatitis E virus, norovirus, and rotavirus using  
345 real time RT-PCR. *Int J Food Microbiol* 185:33-40. doi:10.1016/j.ijfoodmicro.2014.05.006 [doi].
- 346 11. Salines M, Demange A, Stephant G, Renson P, Bourry O, Andraud M, Rose N, Pavio N.  
347 2019. Persistent viremia and presence of hepatitis E virus RNA in pig muscle meat after  
348 experimental co-infection with porcine reproductive and respiratory syndrome virus. *Int J Food*  
349 *Microbiol* 292:144-149. doi:S0168-1605(18)30937-1 [pii].
- 350 12. Williams TP, Kasorndorkbua C, Halbur PG, Haqshenas G, Guenette DK, Toth TE, Meng XJ.  
351 2001. Evidence of extrahepatic sites of replication of the hepatitis E virus in a swine model. *J*  
352 *Clin Microbiol* 39:3040-3046.

- 353 13. Bose PD, Das BC, Hazam RK, Kumar A, Medhi S, Kar P. 2014. Evidence of extrahepatic  
354 replication of hepatitis E virus in human placenta. *J Gen Virol* 95:1266-1271.  
355 doi:10.1099/vir.0.063602-0 [doi].
- 356 14. Murrison LB, Sherman KE. 2017. The Enigma of Hepatitis E Virus. *Gastroenterol Hepatol*  
357 (N Y) 13:484-491.
- 358 15. Chauhan A, Webb G, Ferguson J. 2019. Clinical presentations of Hepatitis E: A clinical  
359 review with representative case histories. *Clin Res Hepatol Gastroenterol* . doi:S2210-  
360 7401(19)30033-6 [pii].
- 361 16. Kamar N, Abravanel F, Lhomme S, Rostaing L, Izopet J. 2015. Hepatitis E virus: chronic  
362 infection, extra-hepatic manifestations, and treatment. *Clin Res Hepatol Gastroenterol* 39:20-27.  
363 doi:10.1016/j.clinre.2014.07.005 [doi].
- 364 17. Halac U, Beland K, Lapierre P, Patey N, Ward P, Brassard J, Houde A, Alvarez F. 2012.  
365 Chronic hepatitis E infection in children with liver transplantation. *Gut* 61:597-603.  
366 doi:10.1136/gutjnl-2011-300708 [doi].
- 367 18. Fujiwara S, Yokokawa Y, Morino K, Hayasaka K, Kawabata M, Shimizu T. 2014. Chronic  
368 hepatitis E: a review of the literature. *J Viral Hepat* 21:78-89. doi:10.1111/jvh.12156 [doi].
- 369 19. Van der Poel WHM, Dalton HR, Johne R, Pavio N, Bouwknegt M, Wu T, Cook N, Meng  
370 XJ. 2018. Knowledge gaps and research priorities in the prevention and control of hepatitis E  
371 virus infection. *Transbound Emerg Dis* 65 Suppl 1:22-29. doi:10.1111/tbed.12760 [doi].
- 372 20. King NJ, Hewitt J, Perchec-Merrien AM. 2018. Hiding in Plain Sight? It's Time to Investigate  
373 Other Possible Transmission Routes for Hepatitis E Virus (HEV) in Developed Countries. *Food*  
374 *Environ Virol* 10:225-252. doi:10.1007/s12560-018-9342-8 [doi].
- 375 21. Salines M, Andraud M, Rose N. 2017. From the epidemiology of hepatitis E virus (HEV)  
376 within the swine reservoir to public health risk mitigation strategies: a comprehensive review.  
377 *Vet Res* 48:31-017-0436-3. doi:10.1186/s13567-017-0436-3 [doi].
- 378 22. Krog JS, Larsen LE, Breum SO. 2019. Tracing Hepatitis E Virus in Pigs From Birth to  
379 Slaughter. *Front Vet Sci* 6:50. doi:10.3389/fvets.2019.00050 [doi].
- 380 23. Motoya T, Umezawa M, Goto K, Doi I, Nagata N, Ikeda Y, Sakuta A, Sasaki N, Ishii K.  
381 2019. High prevalence of hepatitis E virus infection among domestic pigs in Ibaraki Prefecture,  
382 Japan. *BMC Vet Res* 15:87-019-1816-x. doi:10.1186/s12917-019-1816-x [doi].
- 383 24. Zhou JH, Shang Y, Cao XA, Wang YN, Liu Y, Hu Y, Lan X. 2019. Potential effects of  
384 hepatitis E virus infection in swine on public health in China. *Infect Genet Evol* 68:113-118.  
385 doi:S1567-1348(18)30749-4 [pii].

- 386 25. Mykytczuk O, Harlow J, Bidawid S, Corneau N, Nasheri N. 2017. Prevalence and Molecular  
387 Characterization of the Hepatitis E Virus in Retail Pork Products Marketed in Canada. *Food*  
388 *Environ Virol* 9:208-218. doi:10.1007/s12560-017-9281-9 [doi].
- 389 26. Kingsley DH. 2013. High pressure processing and its application to the challenge of virus-  
390 contaminated foods. *Food Environ Virol* 5:1-12. doi:10.1007/s12560-012-9094-9 [doi].
- 391 27. Emmoth E, Rovira J, Rajkovic A, Corcuera E, Wilches Perez D, Dergel I, Ottoson JR, Widen  
392 F. 2017. Inactivation of Viruses and Bacteriophages as Models for Swine Hepatitis E Virus in  
393 Food Matrices. *Food Environ Virol* 9:20-34. doi:10.1007/s12560-016-9268-y [doi].
- 394 28. Cook N, D'Agostino M, Johne R. 2017. Potential Approaches to Assess the Infectivity of  
395 Hepatitis E Virus in Pork Products: A Review. *Food Environ Virol* 9:243-255.  
396 doi:10.1007/s12560-017-9303-7 [doi].
- 397 29. Johne R, Trojnar E, Filter M, Hofmann J. 2016. Thermal Stability of Hepatitis E Virus as  
398 Estimated by a Cell Culture Method. *Appl Environ Microbiol* 82:4225-4231.  
399 doi:10.1128/AEM.00951-16 [doi].
- 400 30. Schemmerer M, Apelt S, Trojnar E, Ulrich RG, Wenzel JJ, Johne R. 2016. Enhanced  
401 Replication of Hepatitis E Virus Strain 47832c in an A549-Derived Subclonal Cell Line. *Viruses*  
402 8:10.3390/v8100267. doi:E267 [pii].
- 403 31. ISO. 2017. Microbiology of the Food Chain – Horizontal Method for Determination of  
404 Hepatitis A Virus and Norovirus Using Real-Time RT-PCR – Part 1: Method for Quantification.  
405 ISO 15216-1:2017. International Organization for Standardization .
- 406 32. Nasheri N, Petronella N, Ronholm J, Bidawid S, Corneau N. 2017. Characterization of the  
407 Genomic Diversity of Norovirus in Linked Patients Using a Metagenomic Deep Sequencing  
408 Approach. *Front Microbiol* 8:73. doi:10.3389/fmicb.2017.00073 [doi].
- 409 33. Johne R, Reetz J, Ulrich RG, Machnowska P, Sachsenroder J, Nickel P, Hofmann J. 2014.  
410 An ORF1-rearranged hepatitis E virus derived from a chronically infected patient efficiently  
411 replicates in cell culture. *J Viral Hepat* 21:447-456. doi:10.1111/jvh.12157 [doi].
- 412 34. Edgar RC. 2004. MUSCLE: multiple sequence alignment with high accuracy and high  
413 throughput. *Nucleic Acids Res* 32:1792-1797. doi:10.1093/nar/gkh340 [doi].
- 414 35. Larkin MA, Blackshields G, Brown NP, Chenna R, McGettigan PA, McWilliam H, Valentin  
415 F, Wallace IM, Wilm A, Lopez R, Thompson JD, Gibson TJ, Higgins DG. 2007. Clustal W and  
416 Clustal X version 2.0. *Bioinformatics* 23:2947-2948. doi:btm404 [pii].
- 417 36. Tamura K, Stecher G, Peterson D, Filipowski A, Kumar S. 2013. MEGA6: Molecular  
418 Evolutionary Genetics Analysis version 6.0. *Mol Biol Evol* 30:2725-2729.  
419 doi:10.1093/molbev/mst197 [doi].



- 420 37. Hugas M, Garriga M, Monfort JM. 2002. New mild technologies in meat processing: high  
421 pressure as a model technology. *Meat Sci* 62:359-371. doi:S0309-1740(02)00122-5 [pii].
- 422 38. Guu TS, Liu Z, Ye Q, Mata DA, Li K, Yin C, Zhang J, Tao YJ. 2009. Structure of the  
423 hepatitis E virus-like particle suggests mechanisms for virus assembly and receptor binding. *Proc*  
424 *Natl Acad Sci U S A* 106:12992-12997. doi:10.1073/pnas.0904848106 [doi].
- 425 39. Kobayashi T, Takahashi M, Tanggis, Mulyanto, Jirintai S, Nagashima S, Nishizawa T,  
426 Okamoto H. 2016. Characterization and epitope mapping of monoclonal antibodies raised  
427 against rat hepatitis E virus capsid protein: An evaluation of their neutralizing activity in a cell  
428 culture system. *J Virol Methods* 233:78-88. doi:10.1016/j.jviromet.2016.03.004 [doi].
- 429 40. Teunis PF, Moe CL, Liu P, Miller SE, Lindesmith L, Baric RS, Le Pendu J, Calderon RL.  
430 2008. Norwalk virus: how infectious is it? *J Med Virol* 80:1468-1476. doi:10.1002/jmv.21237  
431 [doi].
- 432 41. Caul EO. 1994. Small round structured viruses: airborne transmission and hospital control.  
433 *Lancet* 343:1240-1242. doi:S0140-6736(94)92146-6 [pii].
- 434 42. Koopmans M, von Bonsdorff CH, Vinje J, de Medici D, Monroe S. 2002. Foodborne viruses.  
435 *FEMS Microbiol Rev* 26:187-205. doi:S0168644502000967 [pii].
- 436 43. Randazzo W, Vasquez-Garcia A, Aznar R, Sanchez G. 2018. Viability RT-qPCR to  
437 Distinguish Between HEV and HAV With Intact and Altered Capsids. *Front Microbiol* 9:1973.  
438 doi:10.3389/fmicb.2018.01973 [doi].
- 439 44. Kingsley DH, Hoover DG, Papafragkou E, Richards GP. 2002. Inactivation of hepatitis A  
440 virus and a calicivirus by high hydrostatic pressure. *J Food Prot* 65:1605-1609.
- 441 45. Lou F, DiCaprio E, Li X, Dai X, Ma Y, Hughes J, Chen H, Kingsley DH, Li J. 2016.  
442 Variable High-Pressure-Processing Sensitivities for Genogroup II Human Noroviruses. *Appl*  
443 *Environ Microbiol* 82:6037-6045. doi:10.1128/AEM.01575-16 [doi].
- 444 46. Lou F, Ye M, Ma Y, Li X, DiCaprio E, Chen H, Krakowka S, Hughes J, Kingsley D, Li J.  
445 2015. A Gnotobiotic Pig Model for Determining Human Norovirus Inactivation by High-  
446 Pressure Processing. *Appl Environ Microbiol* 81:6679-6687. doi:10.1128/AEM.01566-15 [doi].
- 447 47. Feng Z, Lemon SM. 2014. Peek-a-boo: membrane hijacking and the pathogenesis of viral  
448 hepatitis. *Trends Microbiol* 22:59-64. doi:10.1016/j.tim.2013.10.005 [doi].
- 449 48. Qi Y, Zhang F, Zhang L, Harrison TJ, Huang W, Zhao C, Kong W, Jiang C, Wang Y. 2015.  
450 Hepatitis E Virus Produced from Cell Culture Has a Lipid Envelope. *PLoS One* 10:e0132503.  
451 doi:10.1371/journal.pone.0132503 [doi].
- 452 49. Balamurugan S, Inmanee P, Souza J, Strange P, Pirak T, Barbut S. 2018. Effects of High  
453 Pressure Processing and Hot Water Pasteurization of Cooked Sausages on Inactivation of

- 454 Inoculated *Listeria monocytogenes*, Natural Populations of Lactic Acid Bacteria, *Pseudomonas*  
455 spp., and Coliforms and Their Recovery during Storage at 4 and 10 degrees C. *J Food Prot*  
456 81:1245-1251. doi:10.4315/0362-028X.JFP-18-024 [doi].
- 457 50. Komora N, Bruschi C, Ferreira V, Maciel C, Brandao TRS, Fernandes R, Saraiva JA, Castro  
458 SM, Teixeira P. 2018. The protective effect of food matrices on *Listeria lytic* bacteriophage P100  
459 application towards high pressure processing. *Food Microbiol* 76:416-425. doi:S0740-  
460 0020(17)31099-7 [pii].
- 461 51. Leon JS, Kingsley DH, Montes JS, Richards GP, Lyon GM, Abdulhafid GM, Seitz SR,  
462 Fernandez ML, Teunis PF, Flick GJ, Moe CL. 2011. Randomized, double-blinded clinical trial  
463 for human norovirus inactivation in oysters by high hydrostatic pressure processing. *Appl*  
464 *Environ Microbiol* 77:5476-5482. doi:10.1128/AEM.02801-10 [doi].
- 465 52. Bidawid S, Farber JM, Sattar SA, Hayward S. 2000. Heat inactivation of hepatitis A virus in  
466 dairy foods. *J Food Prot* 63:522-528.
- 467
